# Supplementary material for: FAK Executes Anti-Senescence via Regulating EZH2 Signaling in Non-Small Cell Lung Cancer Cells
Source: MDPI journal article supplement (doi:10.3390/biomedicines10081937), 2022-08-10
Supplement: s1 [file s1]

## *Supplementary Material*

# **FAK Executes Anti-Senescence via Regulating EZH2 Signaling in Non-Small Cell Lung Cancer Cells**

Hsiang-Hao Chuang <sup>1,†</sup>, Ming-Shyan Huang <sup>2,†</sup>, Yen-Yi Zhen <sup>3</sup>, Cheng-Hao Chuang <sup>1</sup>, Ying-Ray Lee <sup>4</sup>, Michael Hsiao <sup>5,\*</sup> and Chih-Jen Yang <sup>1,6,7,\*</sup>

\* Correspondence: mhsiao@gate.sinica.edu.tw (M.H.); chjeya@cc.kmu.edu.tw (C.-J.Y.)

## **1. Supplementary Figures and Table**

### **1.1 Supplementary Table**

## Supplementary Table S1

### KEY RESOURCES TABLE

| RAGENT or RESOURCE                      | SOURCE                                       | IDENTIFIER          | WORKING STATUS     |
|-----------------------------------------|----------------------------------------------|---------------------|--------------------|
| <b>Antibodies</b>                       |                                              |                     |                    |
| Anti-beta-Actin                         | SIGMA                                        | Cat# SI-A5441-.2 ml | 5k dilution        |
| Anti-EZH2                               | Cell Signaling Technology                    | Cat# 5246           | 1k dilution        |
| Anti-FAK (D-1)                          | Santa Cruz                                   | Cat# sc-271126      | 500 dilution       |
| Anti-GFP                                | GeneTex                                      | Cat# GTX113617      | 10k dilution       |
| Anti-Histone 3                          | Proteintech                                  | Cat# 17168-1-AP     | 2k dilution        |
| Anti-Histone 3 (tri methyl K9)          | Abcam                                        | Cat# ab8898         | 1k dilution        |
| Anti-Histone 3 (tri methyl K27)         | Cell Signaling Technology                    | Cat# 9733           | 1k dilution        |
| Anti-lamin A/C                          | GeneTex                                      | Cat# GTX101127      | 1k dilution        |
| Anti-p16                                | Abcam                                        | Cat# ab108349       | 1k dilution        |
| Anti-p21                                | Cell Signaling Technology                    | Cat# 2947           | 1k dilution        |
| Anti-p27                                | GeneTex                                      | Cat# GTX100446      | 1k dilution        |
| Anti-p53                                | Cell Signaling Technology                    | Cat# 2527           | 1k dilution        |
| Anti-Phospho-FAK (Tyr397)               | Cell Signaling Technology                    | Cat# 3823           | 500 dilution       |
| Anti-Phospho-FAK (Tyr576/Tyr577)        | Cell Signaling Technology                    | Cat# 3281           | 500 dilution       |
| <b>Cell lines</b>                       |                                              |                     |                    |
| A549                                    | ATCC                                         | ATCC® CCL-185       | RPMI 1640 + 10%FBS |
| H1299                                   | ATCC                                         | ATCC® CRL-5803      | RPMI 1640 + 10%FBS |
| <b>Chemicals, Enzymes and Materials</b> |                                              |                     |                    |
| Dulbecco's Modified Eagle Medium        | Gibco                                        | Cat# 12100-061      |                    |
| Fetal bovine serum                      | Gibco                                        | Cat# 10437-028      |                    |
| Lipofectamine 2000                      | Invitrogen                                   | Cat# 11668019       |                    |
| PF-573228                               | MedChemExpress                               | Cat# HY-10461       |                    |
| PhosSTOP™                               | Roche                                        | ROC-04906845001     |                    |
| RIPA Lysis Buffer, 10X                  | Millipore                                    | Cat# 20-188         |                    |
| RPMI medium1640                         | Gibco                                        | Cat# 31800-089      |                    |
| X-Gal Stock Solution                    | Millipore                                    | Cat# BG-3-G         |                    |
| WM-1119                                 | MedChemExpress                               | Cat# HY-102058      |                    |
| <b>Recombinant DNA</b>                  |                                              |                     |                    |
| AcGFP1-C1                               | addgene                                      | Plasmid #54607      |                    |
|                                         | In the present study, cloning PTK2 cDNA from |                     |                    |
| AcGFP1-FAK                              | pDONR223-PTK2 with KpnI/BamHI restriction    | N/A                 |                    |
|                                         | sites onto AcGFP1-C1                         |                     |                    |

|                                |                                     |                |
|--------------------------------|-------------------------------------|----------------|
| pcDNA3.1(+) EZH2-myc-His       | Dr. Long-Yuan Li at NCHU            | N/A            |
| pcDNA3.1(+)/myc-His A          | Invitrogen                          | Cat# V80020    |
| pCMVdeltaR8.91                 | RNAi Core Facility, Academia Sinica |                |
| pMDG                           | RNAi Core Facility, Academia Sinica |                |
| Luciferase shRNA               | RNAi Core Facility, Academia Sinica |                |
| FAK shRNA #1                   | RNAi Core Facility, Academia Sinica | TRCN0000121207 |
| FAK shRNA #2                   | RNAi Core Facility, Academia Sinica | TRCN0000121318 |
| EZH2 shRNA #1                  | RNAi Core Facility, Academia Sinica | TRCN0000040073 |
| EZH2 shRNA #2                  | RNAi Core Facility, Academia Sinica | TRCN0000040076 |
| <b>Other</b>                   |                                     |                |
| Leica DMI6000 B microscope     | Leica                               | N/A            |
| Nikon ECLIPSE Ti microscope    | Nikon                               | N/A            |
| Panoramic MIDI digital scanner | 3DHISTECH                           | N/A            |

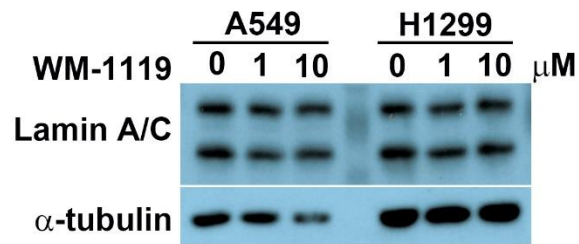

**Figure S1. WM-1119 treatment does not downregulate lamin A/C expression in A549 and H1299 cells.** A549 and H1299 cells were exposed to indicated concentration of WM-1119 for 48 hours, followed by lysate harvesting. It was subjected to immunoblotting for the indicated proteins. As a loading control, an anti- $\alpha$ -tubulin antibody was used.

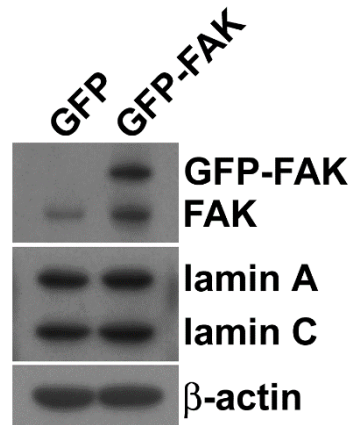

**Figure S2. FAK overexpression does not increase lamin A/C expression in H1299 cells.** H1299 cells were exposed to 10  $\mu$ M PF-573228 for the indicated time, and then the lysates were harvested. It was subjected to immunoblotting against the indicated proteins. As a loading control, an anti- $\beta$ -actin antibody was used.

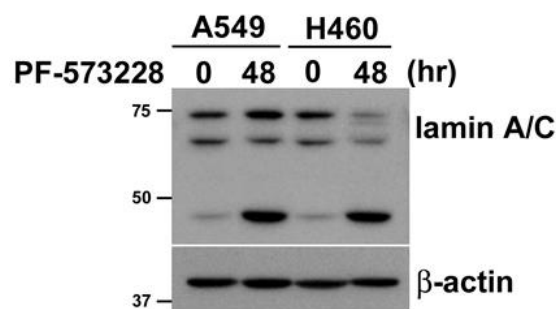

**Figure S3. PF-573228 treatment induces lamin A/C cleavage.** A549 or H460 cells were exposed to 10  $\mu$ M PF-573228 for the indicated time, and then the lysates were harvested. It was subjected to immunoblotting against the indicated proteins. As a loading control, an anti- $\beta$ -actin antibody was used. The result was showed that PF-573228 treatment partially downregulated lamin A/C through the protein cleavage pathway.
